# Supplementary material for: Epidemic cycles driven by host behaviour
Source: PubMed Central journal article supplement (PMC4235258; doi:10.1098/rsif.2014.0575), 2014-10-06

Proportion Infected

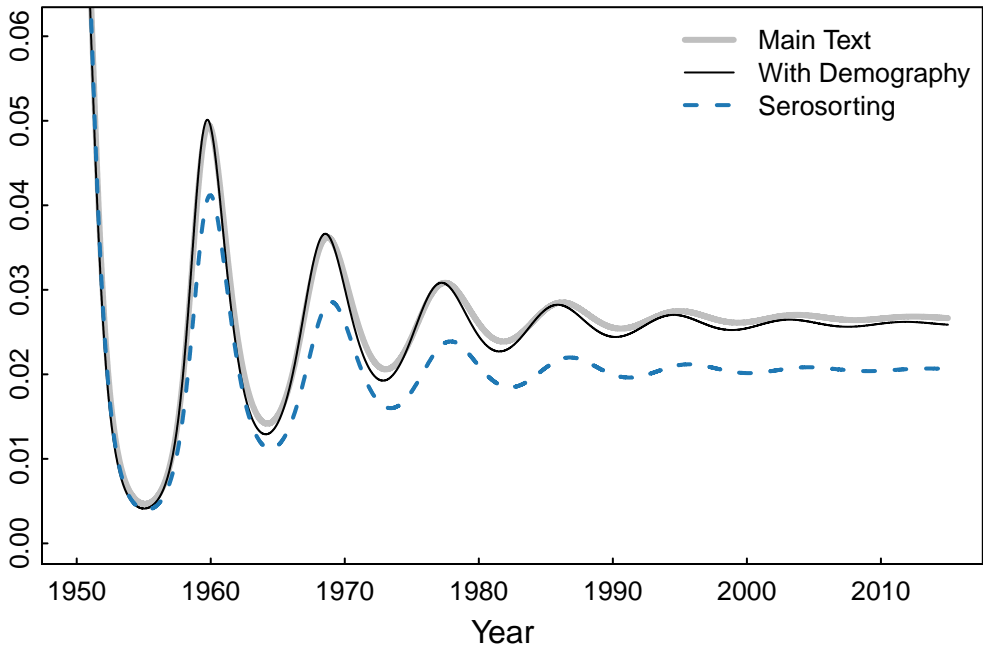

Supplement: rsif20140575supp1.pdf [file rsif20140575supp1.pdf]
